# Supplementary material
Source: PubMed Central journal article supplement (PMC6071816)
Supplement: EHP2619.s001.acco.pdf [file EHP2619.s001.acco.pdf]

**Note to readers with disabilities:** *EHP* strives to ensure that all journal content is accessible to all readers. However, some figures and Supplemental Material published in *EHP* articles may not conform to [508 standards](#) due to the complexity of the information being presented. If you need assistance accessing journal content, please contact [ehp508@niehs.nih.gov](mailto:ehp508@niehs.nih.gov). Our staff will work with you to assess and meet your accessibility needs within 3 working days.

### **Supplemental Material**

#### **Plasma Concentrations of Perfluoroalkyl Substances and Risk of Type 2 Diabetes: A Prospective Investigation among U.S. Women**

Qi Sun, Geng Zong, Damaskini Valvi, Flemming Nielsen, Brent Coull, and Philippe Grandjean

#### **Table of Contents**

**Table S1.** Concentrations and detection rate of minor PFASs by T2D status in the Nurses' Health Study II.

**Table S2.** Partial Spearman correlation coefficients between PFASs and intake of individual foods among controls (n=793).

**Table S3.** Partial Pearson correlation coefficients of PFASs with total adiponectin, insulin, HbA1c, and blood lipids among controls.

**Table S4.** Associations between original PFAS concentrations and risk of T2D after deleting batches with within-batch CVs for any PFASs >20% (n=1,066).

**Table S5.** The association between PFAS concentrations and T2D stratified by duration of follow-up (n=1586).

**Table S1.** Concentrations and detection rate of minor PFASs by T2D status in the Nurses' Health Study II.

| PFASs      | T2D cases (n=793) |                  | T2D controls (n=793) |                  |        |
|------------|-------------------|------------------|----------------------|------------------|--------|
|            | Detection rate %  | Median (IQR)     | Detection rate %     | Median (IQR)     |        |
| PFHxA      | 27%               | 0.02(0.02, 0.04) | 26%                  | 0.02(0.02, 0.04) | 0.85   |
| PFHpA      | 70%               | 0.09(0.02, 0.22) | 63%                  | 0.06(0.02, 0.17) | <0.001 |
| PFUnDA     | 85%               | 0.08(0.04, 0.13) | 89%                  | 0.10(0.06, 0.18) | <0.001 |
| PFDODA     | 21%               | 0.02(0.02, 0.02) | 23%                  | 0.02(0.02, 0.02) | 0.26   |
| PFHpS      | 99%               | 0.72(0.47, 0.98) | 99%                  | 0.61(0.38, 0.92) | <0.001 |
| N-MeFOSAA  | 100%              | 1.50(1.04, 2.39) | 100%                 | 1.55(0.98, 2.37) | 0.82   |
| N-EtFOSAA  | 100%              | 1.94(1.14, 3.70) | 100%                 | 1.74(1.02, 3.25) | 0.009  |
| Total FOSA | 98%               | 0.50(0.22, 1.26) | 99%                  | 0.53(0.24, 1.25) | 0.36   |

Abbreviations: PFHxA, perfluorohexanoic acid; PFHpA, Perfluoroheptanoic acid; PFUnDA, perfluoroundecanoic acid; PFDODA, perfluorododecanoic acid; PFHpS, Perfluoroheptane sulfonate; N-MeFOSAA, N-methyl perfluorooctane sulfonamide; N-EtFOSAA, N-ethyl perfluorooctanesulfonamidoacetic acid; FOSA, Perfluorooctanesulfonamide.

**Table S2.** Partial Spearman correlation coefficients between PFASs and intake of individual foods among controls (n=793).

|                              | PFOS   | PFOA   | PFHxS  | PFNA   | PFDA    |
|------------------------------|--------|--------|--------|--------|---------|
| Apple juice or cider         | 0.01   | -0.01  | -0.03  | -0.004 | 0.02    |
| Avocado                      | -0.04  | -0.05  | -0.03  | -0.03  | -0.05   |
| Bacon                        | 0.11   | 0.01   | -0.02  | 0.07   | 0.01    |
| Bananas                      | -0.04  | -0.04  | -0.02  | -0.06  | -0.04   |
| Beans or lentils             | -0.07  | -0.04  | -0.04  | -0.09  | -0.03   |
| Beef or lamb as main dish    | 0.09   | 0.02   | 0.03   | 0.08   | 0.08    |
| Beef/pork/lamb as a Sandwich | 0.04   | -0.01  | -0.04  | -0.01  | 0.03    |
| Beer                         | -0.04  | -0.04  | -0.07  | -0.02  | -0.05   |
| Beets                        | -0.07  | -0.07  | 0.01   | 0.01   | 0.01    |
| Blueberries                  | 0.05   | 0.02   | 0.02   | 0.12   | 0.13    |
| Broccoli                     | -0.02  | 0.01   | -0.06  | 0.03   | 0.01    |
| Brown rice                   | -0.01  | 0.0004 | 0.03   | -0.004 | 0.01    |
| Brownies                     | 0.08   | 0.07   | -0.003 | 0.04   | -0.0001 |
| Brussels sprouts             | -0.06  | -0.04  | -0.04  | 0.06   | 0.05    |
| Caffeine free coke, Pepsi    | 0.04   | 0.005  | -0.03  | -0.05  | -0.06   |
| Cake, home-baked             | -0.002 | -0.01  | -0.06  | -0.003 | 0.02    |
| Cake, ready-made             | 0.03   | 0.05   | 0.03   | 0.09   | 0.12    |
| Candy bars                   | 0.09   | 0.10   | -0.02  | 0.02   | 0.02    |
| Candy bars with chocolate    | 0.003  | 0.04   | 0.03   | 0.11   | 0.06    |
| Candy without chocolate      | 0.04   | 0.05   | 0.04   | -0.04  | 0.01    |
| Canned tuna                  | -0.04  | -0.06  | 0.02   | 0.02   | -0.06   |
| Cantaloupe                   | 0.11   | 0.07   | 0.04   | 0.12   | 0.13    |
| Cauliflower                  | -0.07  | 0.02   | -0.04  | -0.03  | -0.03   |
| Celery                       | 0.0005 | 0.02   | 0.08   | -0.04  | -0.03   |
| Chicken, with skin           | 0.04   | -0.03  | -0.04  | 0.04   | 0.05    |
| Chocolate bars               | 0.10   | 0.08   | 0.01   | 0.003  | 0.001   |
| Chowder or cream soup        | 0.03   | -0.01  | -0.02  | 0.02   | 0.04    |
| Coffee                       | 0.01   | -0.01  | 0.05   | -0.04  | -0.01   |
| Coke, Pepsi, other colas     | -0.03  | -0.01  | 0.01   | -0.02  | -0.03   |
| Cold breakfast cereal        | -0.03  | -0.01  | -0.04  | -0.04  | -0.02   |
| Coleslaw, cabbage            | -0.01  | 0.05   | -0.01  | 0.01   | 0.03    |
| Cooked carrots or juice      | 0.02   | -0.004 | 0.02   | 0.05   | 0.05    |
| Cooked oatmeal/oat bran      | 0.002  | 0.02   | 0.03   | -0.002 | -0.03   |
| Cookies, home-baked          | -0.003 | -0.08  | -0.05  | -0.03  | -0.03   |
| Cookies, ready-made          | 0.001  | 0.05   | 0.02   | -0.001 | 0.02    |
| Corn                         | 0.08   | 0.02   | -0.03  | 0.05   | 0.07    |
| Crackers                     | 0.04   | 0.02   | 0.03   | 0.04   | -0.01   |
| Dark bread                   | -0.05  | -0.02  | 0.02   | -0.08  | -0.02   |
| Dark meat fish               | -0.01  | -0.01  | 0.05   | 0.12   | 0.10    |
| Decaffeinated coffee         | -0.03  | 0.01   | 0.01   | -0.10  | -0.02   |
| Doughnuts                    | 0.02   | 0.02   | 0.03   | 0.02   | 0.02    |
| Eggplant, zucchini           | -0.004 | -0.02  | -0.02  | 0.08   | 0.10    |
| Eggs                         | 0.03   | -0.03  | -0.03  | -0.02  | -0.04   |
| English muffins/bagels/rolls | -0.05  | -0.03  | -0.04  | 0.03   | 0.01    |
| French fried potatoes        | 0.11   | 0.04   | 0.03   | 0.06   | 0.01    |

|                                       |                         |        |        |                         |                         |
|---------------------------------------|-------------------------|--------|--------|-------------------------|-------------------------|
| Fresh apples or pears                 | -0.02                   | -0.03  | 0.05   | -0.04                   | -0.04                   |
| Garlic                                | 0.004                   | -0.04  | 0.01   | 0.05                    | 0.05                    |
| Grapefruit                            | 0.01                    | 0.04   | 0.02   | 0.06                    | 0.05                    |
| Grapefruit juice                      | -0.03                   | -0.02  | -0.02  | 0.06                    | 0.05                    |
| Green peppers                         | 0.02                    | 0.03   | 0.06   | 0.09                    | 0.04                    |
| Kale/mustard/chard                    | -0.03                   | -0.01  | 0.02   | 0.08                    | 0.01                    |
| Hamburger                             | 0.05                    | -0.01  | -0.04  | 0.01                    | -0.02                   |
| Hawaiian punch                        | 0.01                    | -0.07  | -0.05  | -0.07                   | -0.05                   |
| Hot dogs                              | 0.04                    | -0.04  | 0.03   | 0.002                   | 0.02                    |
| Iceberg or head lettuce               | 0.02                    | 0.05   | 0.13   | -0.02                   | -0.003                  |
| Jams, jellies                         | -0.04                   | 0.05   | 0.06   | 0.03                    | 0.02                    |
| Light beer                            | -0.05                   | -0.09  | -0.07  | -0.06                   | 0.003                   |
| Liquor                                | -0.04                   | 0.003  | 0.02   | -0.02                   | -0.04                   |
| Low calorie caffeine-free cola        | 0.04                    | 0.04   | 0.05   | 0.03                    | 0.01                    |
| Low calorie cola                      | -0.01                   | 0.05   | 0.02   | 0.04                    | 0.01                    |
| Mayonnaise                            | 0.06                    | 0.05   | 0.03   | 0.01                    | 0.002                   |
| Mixed vegetables                      | 0.04                    | -0.002 | 0.02   | 0.03                    | 0.02                    |
| Muffins or biscuits                   | 0.07                    | 0.02   | -0.01  | 0.07                    | 0.08                    |
| Oat bran                              | -0.01                   | 0.004  | -0.03  | -0.04                   | 0.02                    |
| Oil and vinegar dressing              | -0.03                   | -0.05  | 0.03   | -0.02                   | -0.02                   |
| Olive oil dressing                    | 0.0004                  | -0.01  | -0.004 | -0.01                   | -0.01                   |
| Onion as a garnish                    | 0.07                    | 0.02   | 0.05   | -0.01                   | 0.01                    |
| Onion as a vegetable                  | 0.04                    | 0.02   | 0.03   | 0.07                    | 0.03                    |
| Orange juice                          | -0.004                  | 0.03   | 0.01   | -0.03                   | -0.05                   |
| Orange squash                         | -0.003                  | -0.04  | -0.02  | 0.04                    | 0.06                    |
| Oranges                               | 0.07                    | 0.05   | 0.05   | 0.002                   | 0.04                    |
| Other carbonated beverage with sugar  | -0.02                   | -0.02  | -0.04  | -0.07                   | -0.02                   |
| Other low calorie carbonated beverage | 0.02                    | 0.02   | -0.005 | 0.02                    | -0.002                  |
| Other bran                            | -0.01                   | 0.02   | 0.01   | -0.02                   | 0.03                    |
| Other cooked breakfast cereal         | -0.01                   | -0.004 | 0.01   | -0.02                   | -0.03                   |
| Other fish                            | 0.07                    | 0.04   | 0.08   | <b>0.16<sup>a</sup></b> | <b>0.19<sup>a</sup></b> |
| Other fruit juices                    | 0.02                    | -0.02  | 0.04   | -0.05                   | -0.05                   |
| Other grains                          | -0.07                   | -0.06  | 0.01   | -0.05                   | -0.04                   |
| Other nuts                            | -0.05                   | -0.03  | -0.05  | -0.08                   | -0.08                   |
| Pancakes or Waffles                   | -0.04                   | -0.03  | -0.05  | -0.06                   | -0.01                   |
| Pasta                                 | -0.05                   | -0.05  | -0.05  | 0.02                    | 0.02                    |
| Peach, apricots, plums                | 0.02                    | 0.02   | 0.02   | 0.04                    | 0.06                    |
| Peanut butter                         | -0.03                   | -0.04  | -0.09  | -0.13                   | -0.08                   |
| Peanuts                               | 0.04                    | -0.03  | -0.04  | -0.06                   | -0.07                   |
| Peas, or lima beans                   | -0.11                   | -0.06  | -0.05  | -0.06                   | -0.04                   |
| Pie, home-baked                       | 0.001                   | -0.08  | -0.03  | 0.03                    | 0.05                    |
| Pie, ready-made                       | 0.04                    | -0.02  | 0.03   | 0.02                    | 0.05                    |
| Pizza                                 | 0.04                    | 0.01   | -0.03  | -0.03                   | -0.03                   |
| Plain water                           | 0.01                    | 0.05   | 0.03   | 0.01                    | 0.01                    |
| Popcorn                               | <b>0.29<sup>a</sup></b> | 0.13   | -0.04  | -0.04                   | -0.02                   |
| Pork as a main dish                   | 0.06                    | 0.01   | 0.06   | 0.10                    | 0.09                    |
| Potato/corn chips                     | 0.07                    | 0.003  | -0.02  | -0.04                   | -0.06                   |
| Baked/boiled/mashed potatoes          | 0.05                    | 0.02   | -0.01  | 0.02                    | 0.05                    |

|                               |        |        |        |                         |                         |
|-------------------------------|--------|--------|--------|-------------------------|-------------------------|
| Processed meats               | -0.01  | -0.03  | -0.05  | 0.01                    | 0.01                    |
| Prunes                        | -0.08  | -0.06  | -0.04  | -0.07                   | -0.04                   |
| Raisins                       | -0.02  | -0.03  | -0.02  | -0.01                   | 0.03                    |
| Raw carrots                   | -0.002 | 0.02   | 0.06   | -0.09                   | -0.07                   |
| Red chili sauce               | 0.002  | -0.01  | 0.01   | -0.01                   | -0.03                   |
| Red wine                      | 0.01   | -0.02  | -0.03  | -0.03                   | 0.03                    |
| Romaine or leaf lettuce       | -0.02  | -0.04  | 0.03   | 0.01                    | 0.05                    |
| Shrimp, lobster, scallops     | 0.08   | 0.04   | 0.08   | <b>0.24<sup>a</sup></b> | <b>0.24<sup>a</sup></b> |
| Spinach, cooked               | 0.05   | 0.04   | 0.04   | 0.13                    | 0.14                    |
| Spinach, raw                  | 0.01   | 0.01   | 0.05   | 0.05                    | 0.06                    |
| Strawberries                  | 0.04   | 0.02   | 0.01   | 0.07                    | 0.04                    |
| String beans                  | 0.01   | 0.05   | 0.02   | 0.06                    | 0.03                    |
| Sweet roll, homemade          | 0.07   | 0.03   | 0.08   | 0.09                    | 0.07                    |
| Sweet roll, ready made        | 0.04   | 0.05   | -0.02  | 0.06                    | 0.06                    |
| Tea                           | 0.04   | 0.05   | 0.10   | 0.10                    | 0.05                    |
| Tofu or Soybeans              | 0.01   | 0.04   | 0.05   | -0.01                   | 0.01                    |
| Tomato juice                  | 0.05   | 0.07   | 0.04   | 0.04                    | -0.02                   |
| Tomato sauce                  | -0.04  | -0.003 | -0.01  | -0.01                   | 0.002                   |
| Tomatoes                      | -0.02  | -0.02  | 0.04   | 0.01                    | 0.05                    |
| Tortillas                     | -0.03  | -0.06  | -0.03  | -0.09                   | -0.08                   |
| Total coffee                  | -0.01  | -0.003 | 0.04   | -0.07                   | -0.01                   |
| Turkey, including ground Dogs | 0.01   | 0.02   | 0.05   | 0.01                    | 0.05                    |
| Wheat germ                    | -0.01  | -0.02  | -0.05  | -0.05                   | -0.01                   |
| White bread                   | 0.02   | -0.02  | 0.004  | 0.07                    | 0.04                    |
| White rice                    | 0.03   | 0.0001 | 0.03   | 0.11                    | 0.10                    |
| White wine                    | -0.003 | -0.04  | 0.03   | 0.07                    | 0.08                    |
| Yams or sweet potatoes        | 0.02   | -0.04  | -0.002 | 0.10                    | 0.10                    |
| Yogurt                        | -0.02  | -0.02  | 0.04   | -0.02                   | 0.03                    |

Partial spearman correlation was calculated after adjustment of age at blood draw(in years), ethnicity (white, or others), time of blood draw (Mar-May, Jun-Aug, Sep-Nov, and Dec-Feb), fasting status (yes, or no), family history of diabetes (yes, or no), menopausal status and post-menopausal hormone use (pre-menopause, post-menopause and never use hormone, post-menopause and former or current use hormone, or missing), oral contraceptive use (never used, past user, or current user), states of residence (coastal, lake, or inland), breastfeeding duration (Nulliparous or parous without breastfeeding,  $\leq 11$  months, or  $\geq 12$  months), number of children delivery after 1993 (0, 1, or  $\geq 2$ ), smoking status (never, former, or current), alcohol intake (abstainer,  $< 5.0$  g/day, 5.0-14.9 g/day, or  $\geq 15.0$  g/day), physical activity (METs-hr/week,  $< 3$ , 3-8.9, 9-17.9, 18-26.9, or  $\geq 27$ ), baseline BMI ( $\text{kg}/\text{m}^2$ ,  $< 23.0$ , 23.0–24.9, 25.0-29.9, 30.0-34.9, or  $\geq 35.0$ ) and calorie intake.

<sup>a</sup> P<0.05 after Bonferroni correction.

**Table S3.** Partial Pearson correlation coefficients of PFASs with total adiponectin, insulin, HbA1c, and blood lipids among controls.

|                   | PFOS  | P value | PFOA   | P value | PFHxS | P value | PFNA   | P value | PFDA  | P value |
|-------------------|-------|---------|--------|---------|-------|---------|--------|---------|-------|---------|
| PFOA              | 0.58  | <0.001  |        |         |       |         |        |         |       |         |
| PFHxS             | 0.31  | <0.001  | 0.32   | <0.001  |       |         |        |         |       |         |
| PFNA              | 0.43  | <0.001  | 0.37   | <0.001  | 0.27  | <0.001  |        |         |       |         |
| PFDA              | 0.39  | <0.001  | 0.25   | <0.001  | 0.20  | <0.001  | 0.67   | <0.001  |       |         |
| Total adiponectin | -0.04 | 0.25    | -0.05  | 0.21    | 0.05  | 0.20    | -0.001 | 0.99    | 0.08  | 0.03    |
| HbA1c             | 0.04  | 0.28    | 0.03   | 0.40    | -0.03 | 0.41    | 0.01   | 0.79    | -0.02 | 0.55    |
| Total lipids      | 0.07  | 0.06    | 0.10   | 0.005   | 0.003 | 0.93    | 0.08   | 0.04    | 0.04  | 0.26    |
| Cholesterol       | 0.10  | 0.006   | 0.10   | 0.006   | 0.02  | 0.51    | 0.13   | <0.001  | 0.14  | <0.001  |
| triglycerides     | 0.001 | 0.97    | 0.05   | 0.14    | -0.02 | 0.62    | -0.04  | 0.25    | -0.10 | 0.005   |
| Insulin           | 0.04  | 0.40    | -0.003 | 0.95    | -0.02 | 0.62    | -0.001 | 0.97    | -0.06 | 0.16    |

Number of participants were 793, except n=792 for adiponectin, 751 for HbA1c, and 546 for fasting insulin. Partial spearman correlation was calculated after adjustment of age at blood draw (in years), ethnicity (white, or others), time of blood draw (Mar-May, Jun-Aug, Sep-Nov, and Dec-Feb), fasting status (yes, or no), family history of diabetes (yes, or no), menopausal status and post-menopausal hormone use (pre-menopause, post-menopause and never use hormone, post-menopause and former or current use hormone, or missing), oral contraceptive use (never used, past user, or current user), states of residence (coastal, lake, or inland), breastfeeding duration (Nulliparous or parous without breastfeeding,  $\leq 11$  months, or  $\geq 12$  months), number of children delivery after 1993 (0, 1, or  $\geq 2$ ), smoking status (never, former, or current), alcohol intake (abstainer,  $< 5.0$  g/day, 5.0-14.9 g/day, or  $\geq 15.0$  g/day), physical activity (METs-hr/week,  $< 3$ , 3-8.9, 9-17.9, 18-26.9, or  $\geq 27$ ), baseline BMI ( $\text{kg}/\text{m}^2$ ,  $< 23.0$ , 23.0-24.9, 25.0-29.9, 30.0-34.9, or  $\geq 35.0$ ), and AHEI score (in quintiles).

**Table S4.** Associations between original PFAS concentrations and risk of T2D after deleting batches with within-batch CVs for any PFASs >20% (n=1,066).

| <b>Exposure</b>                     | <b>Range (median)<br/>ng/mL</b> | <b>Cases<br/>(n)</b> | <b>Controls<br/>(n)</b> | <b>Model 1<sup>a</sup><br/>OR (95% CI)</b> | <b>Model 2<sup>b</sup><br/>OR (95% CI)</b> |
|-------------------------------------|---------------------------------|----------------------|-------------------------|--------------------------------------------|--------------------------------------------|
| <b>PFOS</b>                         |                                 |                      |                         |                                            |                                            |
| Tertile 1                           | (6.04–26.3) 19.7                | 133                  | 178                     | Ref                                        | Ref                                        |
| Tertile 2                           | (26.3–41.4) 33.1                | 189                  | 178                     | 1.46 (1.05, 2.01)                          | 1.65 (1.01, 2.72)                          |
| Tertile 3                           | (41.4–421) 56.3                 | 210                  | 178                     | 1.62 (1.18, 2.23)                          | 2.04 (1.24, 3.36)                          |
| <i>P</i> -trend <sup>c</sup>        | --                              | --                   | --                      | 0.004                                      | 0.006                                      |
| Log <sub>10</sub> PFOS <sup>d</sup> | --                              | --                   | --                      | 1.17 (1.03, 1.33)                          | 1.27 (1.03, 1.56)                          |
| <i>P</i> -value <sup>e</sup>        | --                              | --                   | --                      | 0.02                                       | 0.03                                       |
| <b>PFOA</b>                         |                                 |                      |                         |                                            |                                            |
| Tertile 1                           | (0.99–3.76) 2.89                | 157                  | 178                     | Ref                                        | Ref                                        |
| Tertile 2                           | (3.76–5.48) 4.57                | 168                  | 178                     | 1.05 (0.77, 1.43)                          | 0.95 (0.59, 1.54)                          |
| Tertile 3                           | (5.48–112) 7.36                 | 207                  | 178                     | 1.30 (0.96, 1.77)                          | 1.63 (0.99, 2.69)                          |
| <i>P</i> -trend <sup>c</sup>        | --                              | --                   | --                      | 0.08                                       | 0.04                                       |
| Log <sub>10</sub> PFOS <sup>d</sup> | --                              | --                   | --                      | 1.15 (1.01, 1.32)                          | 1.23 (1.01, 1.50)                          |
| <i>P</i> -value <sup>e</sup>        | --                              | --                   | --                      | 0.03                                       | 0.04                                       |
| <b>PFHxS</b>                        |                                 |                      |                         |                                            |                                            |
| Tertile 1                           | (0.32–1.49) 1.09                | 166                  | 178                     | Ref                                        | Ref                                        |
| Tertile 2                           | (1.49–2.90) 2.01                | 185                  | 178                     | 1.11 (0.82, 1.50)                          | 1.19 (0.77, 1.86)                          |
| Tertile 3                           | (2.91–429) 4.77                 | 181                  | 178                     | 1.09 (0.81, 1.48)                          | 1.24 (0.78, 1.98)                          |
| <i>P</i> -trend <sup>c</sup>        | --                              | --                   | --                      | 0.58                                       | 0.38                                       |
| Log <sub>10</sub> PFOS <sup>d</sup> | --                              | --                   | --                      | 1.06 (0.94, 1.20)                          | 1.03 (0.86, 1.24)                          |
| <i>P</i> -value <sup>e</sup>        | --                              | --                   | --                      | 0.33                                       | 0.75                                       |
| <b>PFNA</b>                         |                                 |                      |                         |                                            |                                            |
| Tertile 1                           | (0.09–0.47) 0.37                | 184                  | 178                     | Ref                                        | Ref                                        |
| Tertile 2                           | (0.47–0.77) 0.61                | 204                  | 178                     | 1.09 (0.81, 1.48)                          | 1.09 (0.68, 1.72)                          |
| Tertile 3                           | (0.77–7.74) 1.05                | 144                  | 178                     | 0.75 (0.54, 1.05)                          | 0.87 (0.53, 1.43)                          |
| <i>P</i> -trend <sup>c</sup>        | --                              | --                   | --                      | 0.09                                       | 0.58                                       |
| Log <sub>10</sub> PFOS <sup>d</sup> | --                              | --                   | --                      | 0.97 (0.85, 1.10)                          | 1.03 (0.84, 1.26)                          |
| <i>P</i> -value <sup>e</sup>        | --                              | --                   | --                      | 0.63                                       | 0.79                                       |
| <b>PFDA</b>                         |                                 |                      |                         |                                            |                                            |
| Tertile 1                           | (0.01–0.13) 0.09                | 281                  | 178                     | Ref                                        | Ref                                        |
| Tertile 2                           | (0.13–0.20) 0.16                | 160                  | 178                     | 0.58 (0.44, 0.77)                          | 0.83 (0.54, 1.29)                          |
| Tertile 3                           | (0.20–1.95) 0.27                | 91                   | 178                     | 0.31 (0.22, 0.44)                          | 0.56 (0.34, 0.92)                          |
| <i>P</i> -trend <sup>c</sup>        | --                              | --                   | --                      | <0.001                                     | 0.02                                       |
| Log <sub>10</sub> PFOS <sup>d</sup> | --                              | --                   | --                      | 0.63 (0.55, 0.73)                          | 0.82 (0.67, 1.00)                          |
| <i>P</i> -value <sup>e</sup>        | --                              | --                   | --                      | <0.001                                     | 0.05                                       |

Odds ratios according to batch-corrected PFAS tertiles were estimated using conditional logistic regression;

<sup>a</sup> Model 1, conditioned on matching factors, including age, month of sample collection, fasting status, menopausal status and post-menopausal hormone use (pre-menopause, post-menopause and never use hormone, post-menopause and former or current use hormone, or missing);

<sup>b</sup> Model 2, further adjusted for family history of diabetes (yes, or no), oral contraceptive use (never used, past user, or current user), breastfeeding duration at blood draw (nulliparous or parous without breastfeeding, ≤11 months, or ≥12 months) and number of children delivered after 1993 (0, 1, or ≥2), states of residence (coastal, the Great Lake region, or inland), smoking status (never, former, or current), alcohol intake (abstainer, <5.0 g/day, 5.0–14.9 g/day, or ≥15.0 g/day), physical activity

(METs-hr/week, <3, 3-8.9, 9-17.9, 18-26.9, or  $\geq 27$ ), baseline BMI ( $\text{kg}/\text{m}^2$ , <23.0, 23.0–24.9, 25.0-29.9, 30.0-34.9, or  $\geq 35.0$ ), and AHEI score (in quintiles).

<sup>c</sup> P values for trend were calculated by analyzing median PFAS values in each category as a continuous variable.

<sup>d</sup> ORs for a 1-SD increase in log<sub>10</sub>-transformed PFASs, which were 0.2286269 for PFOS, 0.2496809 for PFOA, 0.3444994 for PFHxS, 0.2544009 for PFNA, 0.3080753 for PFDA.



**Table S5.** The association between PFAS concentrations and T2D stratified by duration of follow-up (n=1586).

|                       |                    | Tertile 1 | Tertile 2         | Tertile 3         | P <sub>trend</sub> | P <sub>interaction</sub> |
|-----------------------|--------------------|-----------|-------------------|-------------------|--------------------|--------------------------|
| Time of T2D diagnosis |                    |           |                   |                   |                    |                          |
| PFOS                  | No later than 2005 | Ref       | 1.49 (0.96, 2.33) | 1.62 (1.04, 2.54) | 0.04               | 0.70                     |
|                       | After 2005         | Ref       | 1.37 (0.86, 2.19) | 1.29 (0.81, 2.07) | 0.33               |                          |
| PFOA                  | No later than 2005 | Ref       | 1.22 (0.78, 1.90) | 1.22 (0.78, 1.89) | 0.41               | 0.77                     |
|                       | After 2005         | Ref       | 1.15 (0.73, 1.82) | 1.44 (0.90, 2.31) | 0.12               |                          |
| PFHxS                 | No later than 2005 | Ref       | 1.25 (0.83, 1.90) | 1.15 (0.73, 1.80) | 0.53               | 0.96                     |
|                       | After 2005         | Ref       | 1.10 (0.70, 1.75) | 0.97 (0.60, 1.56) | 0.84               |                          |
| PFNA                  | No later than 2005 | Ref       | 0.65 (0.43, 0.98) | 0.67 (0.42, 1.06) | 0.05               | 0.24                     |
|                       | After 2005         | Ref       | 1.00 (0.64, 1.55) | 0.70 (0.44, 1.11) | 0.13               |                          |
| PFDA                  | No later than 2005 | Ref       | 0.97 (0.62, 1.51) | 1.06 (0.68, 1.64) | 0.76               | 0.79                     |
|                       | After 2005         | Ref       | 1.01 (0.65, 1.58) | 0.94 (0.59, 1.48) | 0.76               |                          |
| AHEI                  |                    |           |                   |                   |                    |                          |
| PFOS                  | ≤48                | Ref       | 1.28 (0.82, 2.00) | 1.45 (0.92, 2.28) | 0.11               | 0.62                     |
|                       | >48                | Ref       | 1.80 (1.13, 2.88) | 1.68 (1.06, 2.67) | 0.04               |                          |
| PFOA                  | ≤48                | Ref       | 0.92 (0.59, 1.44) | 1.36 (0.86, 2.16) | 0.16               | 0.29                     |
|                       | >48                | Ref       | 1.44 (0.91, 2.30) | 1.57 (0.98, 2.50) | 0.07               |                          |
| PFHxS                 | ≤48                | Ref       | 1.72 (1.10, 2.69) | 1.37 (0.86, 2.18) | 0.23               | 0.82                     |
|                       | >48                | Ref       | 1.91 (1.20, 3.03) | 1.65 (1.04, 2.64) | 0.05               |                          |
| PFNA                  | ≤48                | Ref       | 0.86 (0.57, 1.30) | 0.67 (0.42, 1.07) | 0.10               | 0.53                     |
|                       | >48                | Ref       | 0.80 (0.52, 1.25) | 0.92 (0.58, 1.45) | 0.69               |                          |
| PFDA                  | ≤48                | Ref       | 1.05 (0.68, 1.64) | 0.97 (0.61, 1.54) | 0.87               | 0.98                     |
|                       | >48                | Ref       | 1.04 (0.66, 1.63) | 1.08 (0.69, 1.68) | 0.74               |                          |

Odds ratios were estimated using conditional logistic regression based on model 2 in Table 3. P values for trend were performed by median PFAS values in each categorical as a continuous variable. Statistical significance of effect modification (P for interaction) was evaluated by LRT comparing models with and without interaction terms between tertiles of PFAS concentrations and the effect modifiers.
